# Supplementary material for: Molecular precursor mediated selective synthesis of phase pure cubic InSe and hexagonal In2Se3 nanostructures: new anode materials for Li-ion batteries
Source: Royal Society of Chemistry journal article supplement (doi:10.1039/d3dt00234a), 2023-01-01
Supplement: d3dt00234a1.pdf [file d3dt00234a1.pdf]

## Molecular Precursor Mediated Selective Synthesis of Phase Pure Cubic InSe and Hexagonal In<sub>2</sub>Se<sub>3</sub> Nanostructures: New Anode Materials for Li-ion Batteries

Gourab Karmakar,<sup>\*a,b</sup> Dipa Dutta Pathak,<sup>a</sup> Adish Tyagi,<sup>\*a,b</sup> B. P. Mandal,<sup>a,b</sup> A. P. Wadawale,<sup>a</sup> G. Kedarnath,<sup>a,b</sup>

<sup>a</sup>Chemistry Division, Bhabha Atomic Research Centre, Mumbai- 400 085 (India),

<sup>b</sup>Homi Bhabha National Institute, Anushaktinagar, Mumbai- 400 094 (India)

Email: [gourabk@barc.gov.in](mailto:gourabk@barc.gov.in), [tyagia@barc.gov.in](mailto:tyagia@barc.gov.in)

### Experimental

#### Materials and method

InCl<sub>3</sub>, oleylamine (OAm), 1-octadecene (ODE) and analytical grade solvents were procured from commercial sources. bis(4-methyl-2-pyridyl)diselenide; [Sepy(Me-4)]<sub>2</sub> [<sup>1</sup>H NMR (CDCl<sub>3</sub>) δ: 2.20 (s, 6H, Me), 6.89 (d, 2H, 4.1 Hz), 7.62 (s, 2H), 8.31 (d, 2H, 4.9 Hz). <sup>13</sup>C{<sup>1</sup>H} NMR (CDCl<sub>3</sub>) δ: 21.0 (Me), 123.4, 123.9, 148.8, 149.0, 154.0 (ring carbons); <sup>77</sup>Se{<sup>1</sup>H} NMR (CDCl<sub>3</sub>) δ: 476 ppm] was prepared according to the literature method with slight modification.<sup>1</sup> Elemental analyses were carried out on a Thermo Fischer Flash EA-1112 CHNS analyser. The <sup>1</sup>H, <sup>13</sup>C{<sup>1</sup>H} and <sup>77</sup>Se{<sup>1</sup>H} NMR spectra were recorded on a Bruker Advance-II NMR spectrometer operating at 300, 75.47 and 57.24 MHz, respectively. Chemical shifts are relative to internal chloroform peak for <sup>1</sup>H and <sup>13</sup>C{<sup>1</sup>H} NMR spectra and external Ph<sub>2</sub>Se<sub>2</sub> (δ: 463 ppm relative to Me<sub>2</sub>Se) in CDCl<sub>3</sub> for <sup>77</sup>Se{<sup>1</sup>H} NMR spectra.

Thermogravimetric analyses (TGA) were carried out on a Nitzsch STA 409 PC-Luxx TG-DTA instrument, which was calibrated with CaC<sub>2</sub>O<sub>4</sub>·H<sub>2</sub>O. The TG curves were recorded at a heating rate of 10°C min<sup>-1</sup> under a flow of argon. X-ray powder diffraction patterns were obtained on a Philips PW-1820 diffractometer using Cu-Kα radiation. B.E.T. measurement was carried out for studying the adsorption–desorption characteristics on a SORPTOMATIC 1990 at liquid nitrogen temperature (77 K). Prior to the experiment, ~100 mg of the sample was degassed at 10–2 mbar at 100 °C to remove any absorbed gas molecules or moisture. Optical diffuse reflectance measurements in the range 200-1100 nm (1.12 eV to 6.2 eV) were performed on a JASCO V-670 two-beam spectrometer with a diffuse reflectance (DR) attachment consisting of an integration sphere coated with BaSO<sub>4</sub> which was used as a

reference material. Measured reflectance data were converted to absorption (A) using Kubelka-Munk remission function.<sup>2</sup> The band gaps of the samples were estimated by extrapolating the linear portion of the plot to X (energy) axis. SEM and EDS measurements were carried out on ULTRA 55 FESEM of Zeiss and Oxford Inca instruments, respectively. A Zeiss Libra 200 FE Transmission electron microscope (TEM) operating at accelerating voltage of 200 kV was used for TEM studies. The samples for TEM and SAED were prepared by placing a drop of sample dispersed in acetone/toluene on a carbon coated copper grid.

Intensity data for  $\text{In}[\text{Sepy}(\text{Me-4})]_3$  (**1**) was collected from a single crystal at 298(2) K on a XtaLAB Synergy, Dualflex, HyPix four-circle diffractometer with a micro-focus sealed X-ray tube using a mirror as a monochromator and a HyPix detector. The diffractometer was equipped with a low-temperature device and used  $\text{Mo-K}_\alpha$  radiation ( $\lambda = 0.71073 \text{ \AA}$ ). The unit cell parameters (Table 1) were determined from 25 reflections measured by a random search routine. All data were integrated with CrysAlis PRO and a multi-scan absorption correction using SCALE3 ABSPACK was applied.<sup>3</sup> The structures were solved by iterative methods using OLEX 1.2 and refined by full-matrix least-squares methods against  $F^2$  using SHELXL-2017/1.<sup>4,5</sup> All non-hydrogen atoms were refined with anisotropic displacement parameters. The hydrogen atoms were refined isotropically on calculated positions using a riding model with their  $U_{\text{iso}}$  values constrained to 1.5 times the  $U_{\text{eq}}$  of their pivot atoms for terminal  $\text{sp}^3$  carbon atoms and 1.2 times for all other carbon atoms. Disordered moieties were refined using bond length restraints and displacement parameter restraints. Molecular structures were drawn using ORTEP.<sup>6,7</sup>

### Synthesis of $\text{In}[\text{Sepy}(\text{Me-4})]_3$ (**1**)

To a freshly prepared methanolic solution of  $\text{NaSepy}(\text{Me-4})$  [in situ obtained by reducing  $\{\text{Sepy}(\text{Me-4})\}_2$  (400 mg, 1.16 mmol) with  $\text{NaBH}_4$  (87.7 mg, 2.32 mmol) in methanol], solid  $\text{InCl}_3$  (172.4 mg, 0.78 mmol) was added and the reaction mixture was stirred at room temperature for 2 h. The solvents were evaporated under vacuum and the residue was washed thoroughly with diethyl ether followed by water to remove any unreacted ligand and sodium chloride. The final product was dried under reduced pressure and recrystallized from toluene to afford colorless crystals (yield: 692 mg, 94%), m.p. 224°C (dec.). Anal. Calcd. for  $\text{C}_{18}\text{H}_{18}\text{InN}_3\text{Se}_3$ : C, 34.42; H, 2.88; N, 6.69%. Observed: C, 32.46; H, 2.71; N, 5.97%.  $^1\text{H}$  NMR ( $\text{CDCl}_3$ )  $\delta$ : 2.0 (s, 3H, 4-Me); 6.8 (d, 5.1Hz, 1H, H-5), 7.4 (s, 1H, H-3), 7.5 (d, 5.4Hz, 1H, H-6) (ring

proton).  $^{13}\text{C}\{^1\text{H}\}$  NMR ( $\text{CDCl}_3$ )  $\delta$ : 21.1 (4-Me), 119.9, 128.9, 145.2, 150.0, 164.4 (ring carbons).  $^{77}\text{Se}\{^1\text{H}\}$  NMR ( $\text{CDCl}_3$ )  $\delta$ : 332.3 ppm.

### **Preparation of Indium Selenide nanostructures**

The indium selenide nanostructures were prepared using  $\text{In}[\text{Sepy}(\text{Me-4})]_3$  (**1**) as single source molecular precursor by hot injection method utilizing high boiling solvents like OAm and ODE. In a typical hot injection method, 9 mL of high boiling solvent (OAm or ODE) was taken in a three-necked round bottom flask and degassed at  $120^\circ\text{C}$  under argon flow for 30 min. Subsequently, the temperature was raised to  $250^\circ\text{C}$ . In the pre-heated solvent, required amount of the precursor **1** (300 mg, 0.47 mmol), dispersed in OAm (1 mL) was swiftly injected. The reaction temperature dropped by around  $15\text{--}20^\circ\text{C}$  upon injection; however, the set temperature was attained in no time. The temperature was maintained for 5 minutes after which the heat source was removed and the reaction mixture was allowed to cool to  $60^\circ\text{C}$  and methanol (5 mL) was injected to ensure complete precipitation of the nanostructures. The synthesized material was collected after repeated washing with methanol and toluene mixture followed by centrifugation at 8000 rpm for 10 min to remove excess capping agent. The final product was obtained as brown residue.

### **Electrochemical characterization**

To evaluate the electrochemical performance of cubic InSe and hexagonal  $\text{In}_2\text{Se}_3$ , electrodes was fabricated by mixing 70% of active material, 20% of Super P and 10% of carboxymethyl cellulose (CMC) binder in water. After 30 min of mixing, the slurry was uniformly coated on Cu foil and dried at  $50^\circ\text{C}$  for 12 h in a hot air oven. The mass loading of InSe and  $\text{In}_2\text{Se}_3$  on  $1 \times 1$  cm Cu foil was  $2.5\text{--}3.0$  mg  $\text{cm}^{-2}$ . For CR2032 coin cell assembly, Li metal was used as the counter electrode, Whatman Glass Microfiber as the separator, and 1M  $\text{LiPF}_6$  in ethylene carbonate (EC) and dimethylcarbonate (DMC) (1:1, v/v) as electrolytes in an Ar-filled glove box (MBRAUN, UNIlab plus). The performance of the Li-ion half-cell battery was measured using a NEWARE battery charging unit (NEWARE Technology, Ltd, Shenzhen, China) at different current densities within the voltage range of 0.01–3 V (vs. Li/Li<sup>+</sup>). Cyclic voltammetry (CV) was carried out on an Origaflex OGF 500 potentiostat/galvanostat (Origalys, France) within a voltage range of 0.1–3 V at different scan rate. The electrochemical impedance spectroscopy (EIS) was performed using Novocontrol Alpha-A High Frequency

Analyzer with 10 mV AC voltage in the frequency range of 1 Hz to 1 MHz. The specific capacity of the InSe and In<sub>2</sub>Se<sub>3</sub> anodes were calculated based on the weight of the same.

**Figure captions:**

**Figure S1.** <sup>1</sup>H NMR spectra of In[Sepy(Me-4)]<sub>3</sub> (**1**) in CDCl<sub>3</sub>

**Figure S2.** <sup>13</sup>C{<sup>1</sup>H} NMR spectra of In[Sepy(Me-4)]<sub>3</sub> (**1**) in CDCl<sub>3</sub>

**Figure S3.** <sup>77</sup>Se{<sup>1</sup>H} NMR spectra of In[Sepy(Me-4)]<sub>3</sub> (**1**) in CDCl<sub>3</sub>

**Figure S4.** Packing diagram featuring intermolecular C4–H4···Se1 interactions of In[Sepy(Me-4)]<sub>3</sub> (**1**)

**Figure S5.** Thermogravimetric analysis of In[Sepy(Me-4)]<sub>3</sub> (**1**)

**Figure S6.** EDS spectra of (a) hexagonal In<sub>2</sub>Se<sub>3</sub> and (b) cubic InSe synthesized by thermolysis of **1** at 250°C for 5 minutes in ODE and OAm respectively.

**Figure S7.** 2D elemental mapping of (a) hexagonal In<sub>2</sub>Se<sub>3</sub> and (b) cubic InSe synthesized by thermolysis of **1** at 250°C for 5 minutes in ODE and OAm respectively.

**Figure S8.** (a) Typical N<sub>2</sub> adsorption/desorption isotherm and (b) BJH plot for the as synthesized In<sub>2</sub>Se<sub>3</sub> nanomaterials.

**Figure S9.** (a) Typical N<sub>2</sub> adsorption/desorption isotherm and (b) BJH plot for the as synthesized InSe nanomaterials.

**Figure S10.** SEM micrographs of the electrodes consists of (a) hexagonal In<sub>2</sub>Se<sub>3</sub> and (b) cubic InSe after 200 cycle run.

**Figure S11.** EDS spectra of the electrodes consists of (a) hexagonal In<sub>2</sub>Se<sub>3</sub> and (b) cubic InSe after 200 cycle run.

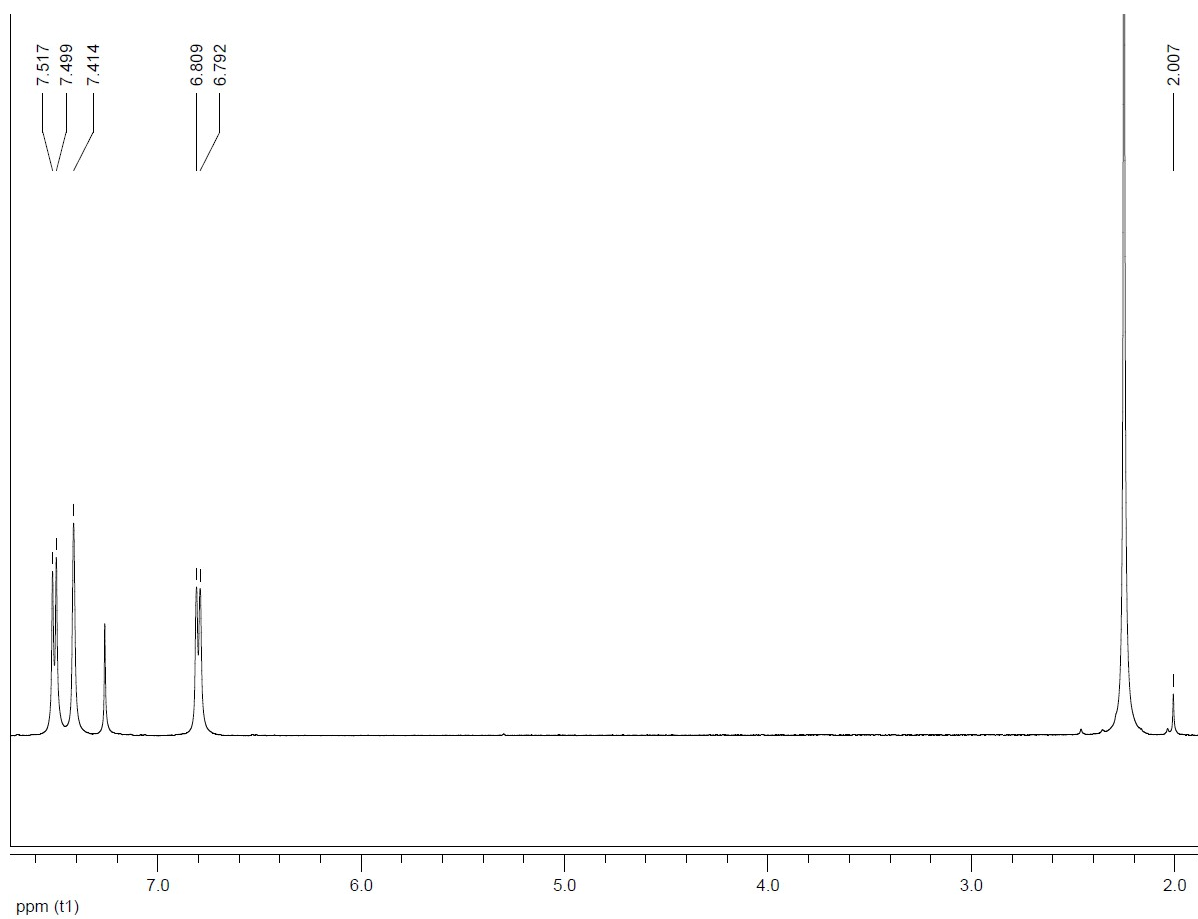

**Figure S1.**  $^1\text{H}$  NMR spectra of  $\text{In}[\text{Sepy}(\text{Me-4})]_3$  (**1**) in  $\text{CDCl}_3$

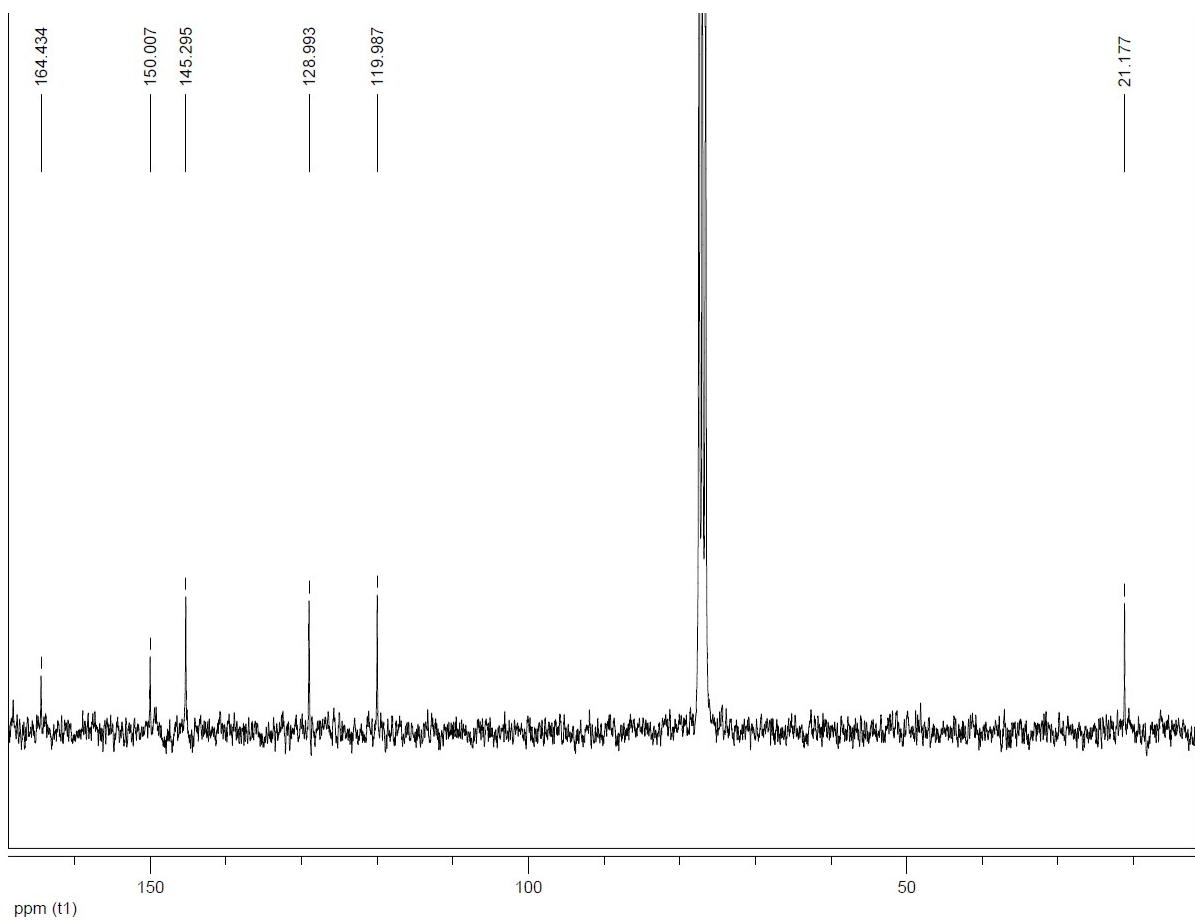

**Figure S2.**  $^{13}\text{C}\{^1\text{H}\}$  NMR spectra of  $\text{In}[\text{Sepy}(\text{Me-4})]_3$  (1) in  $\text{CDCl}_3$

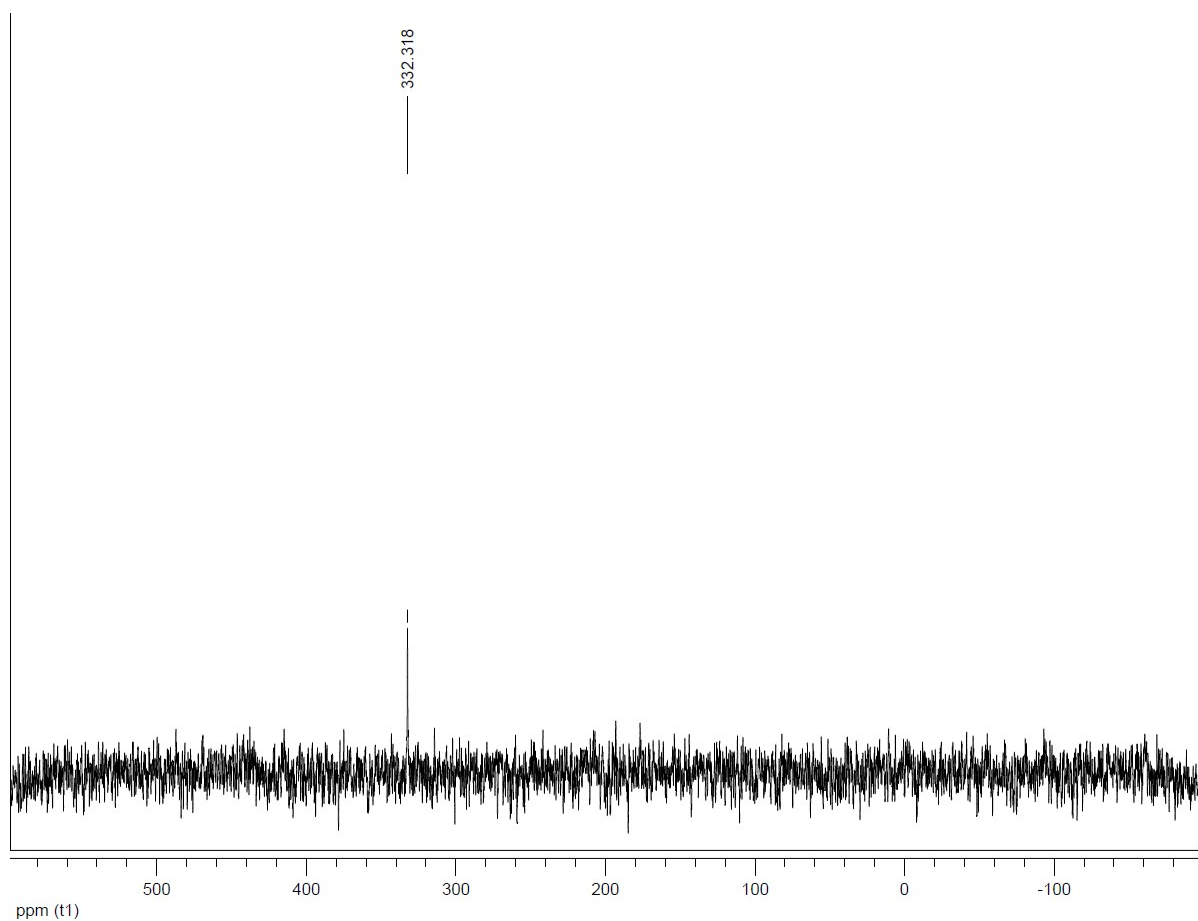

**Figure S3.**  $^{77}\text{Se}\{^1\text{H}\}$  NMR spectra of  $\text{In}[\text{Sepy}(\text{Me-4})]_3$  (**1**) in  $\text{CDCl}_3$

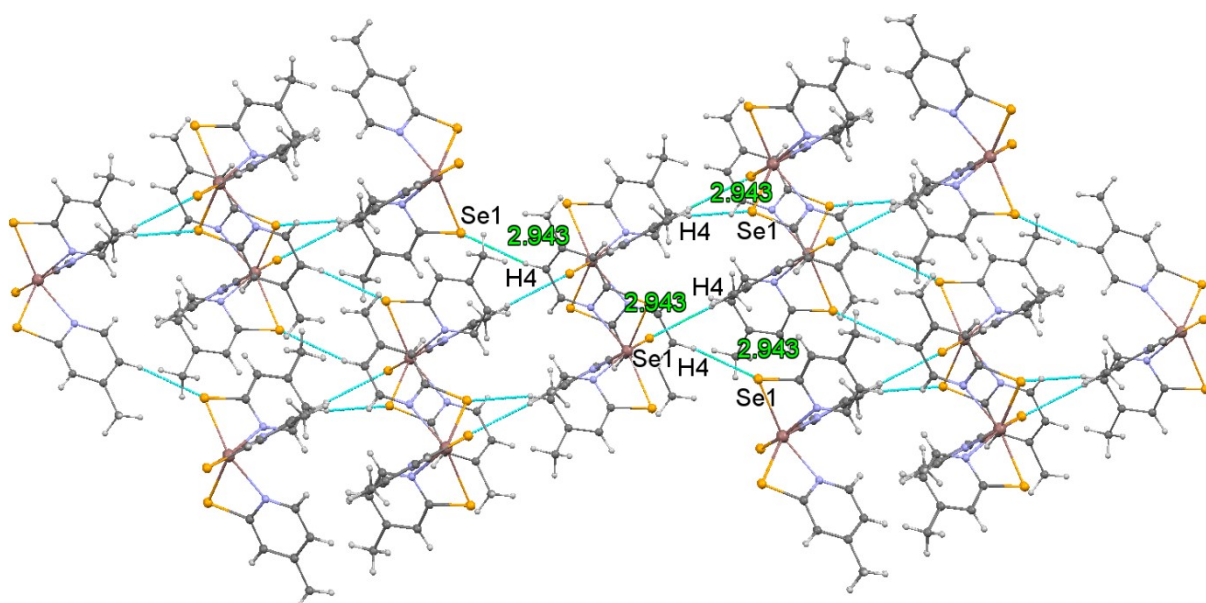

**Figure S4.** Packing diagram featuring intermolecular  $\text{C4-H4}\cdots\text{Se1}$  interactions of  $\text{In}[\text{Sepy}(\text{Me-4})]_3$  (**1**)

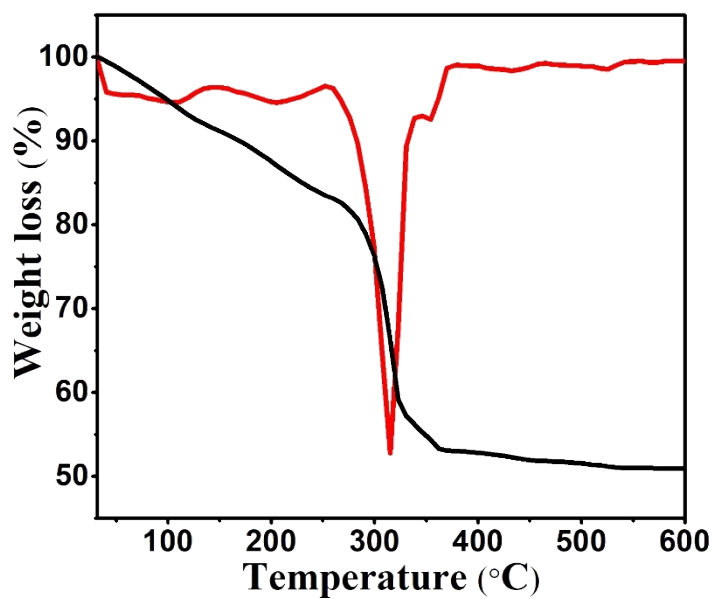

Figure S5. Thermogravimetric analysis of  $\text{In}[\text{Sepy}(\text{Me-4})]_3$  (**1**)

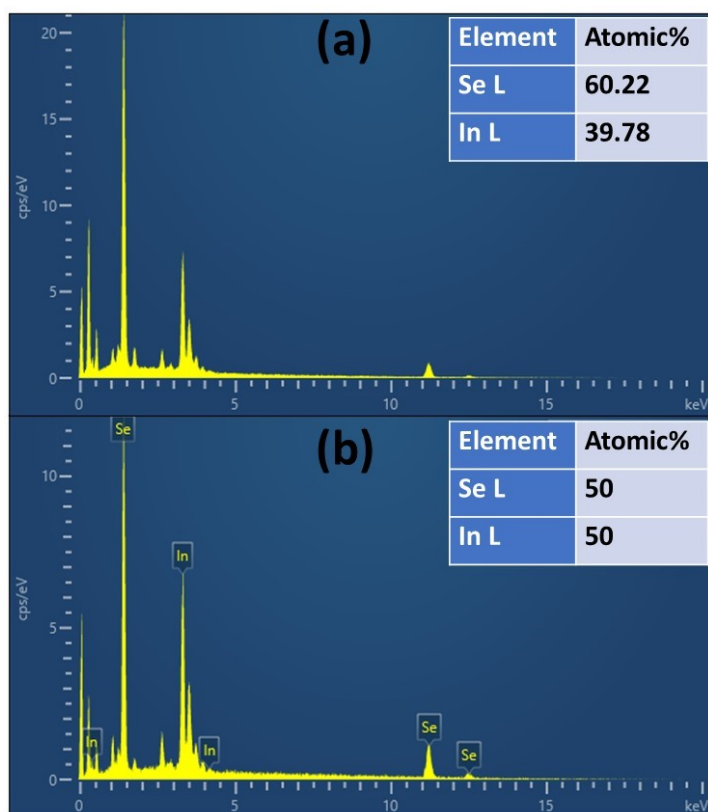

Figure S6. EDS spectra of (a) hexagonal  $\text{In}_2\text{Se}_3$  and (b) cubic  $\text{InSe}$  synthesized by thermolysis of **1** at  $250^\circ\text{C}$  for 5 minutes in ODE and OAm respectively.



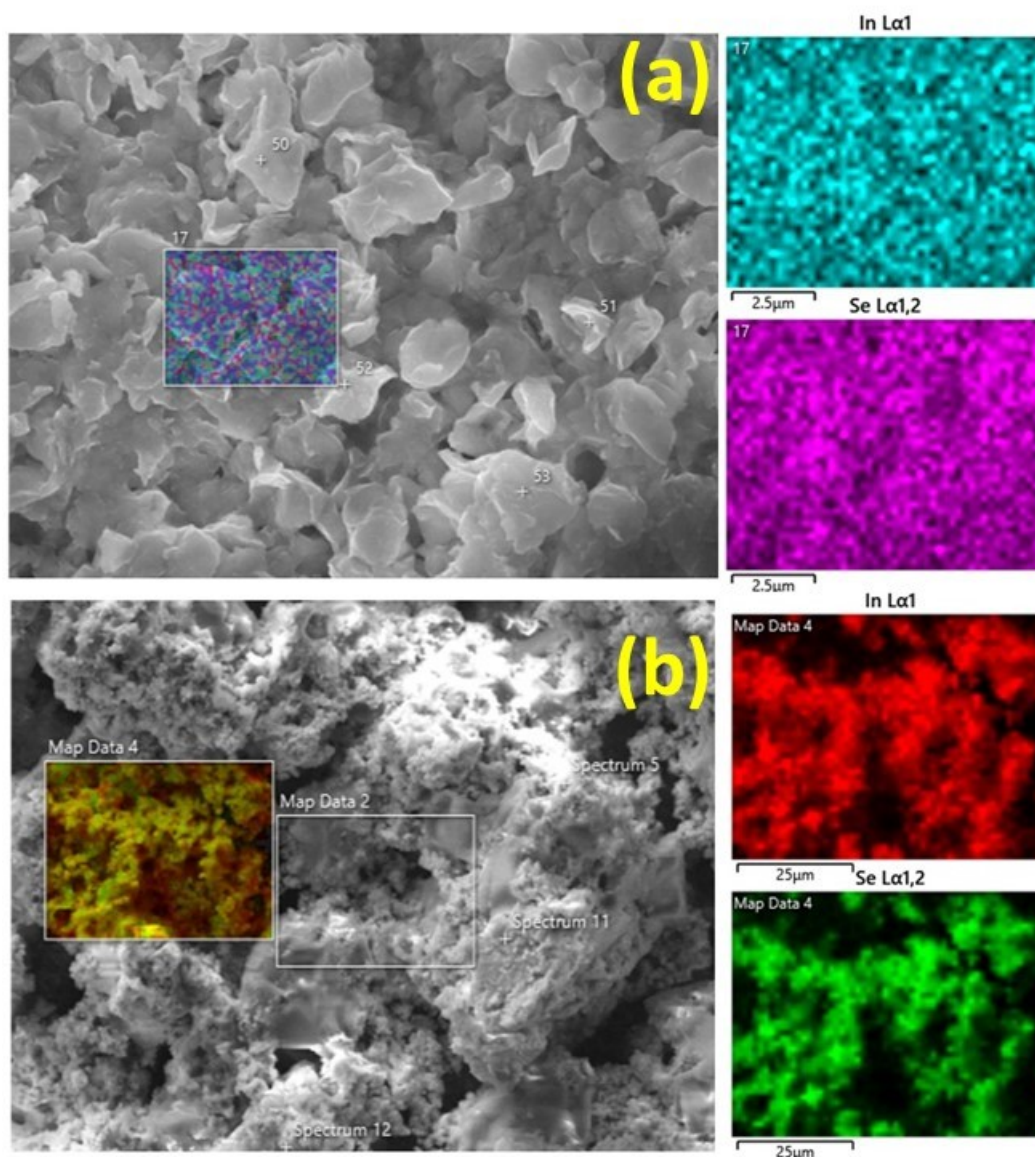

**Figure S7.** 2D elemental mapping of (a) hexagonal  $\text{In}_2\text{Se}_3$  and (b) cubic  $\text{InSe}$  synthesized by thermolysis of **1** at  $250^\circ\text{C}$  for 5 minutes in ODE and OAm respectively.

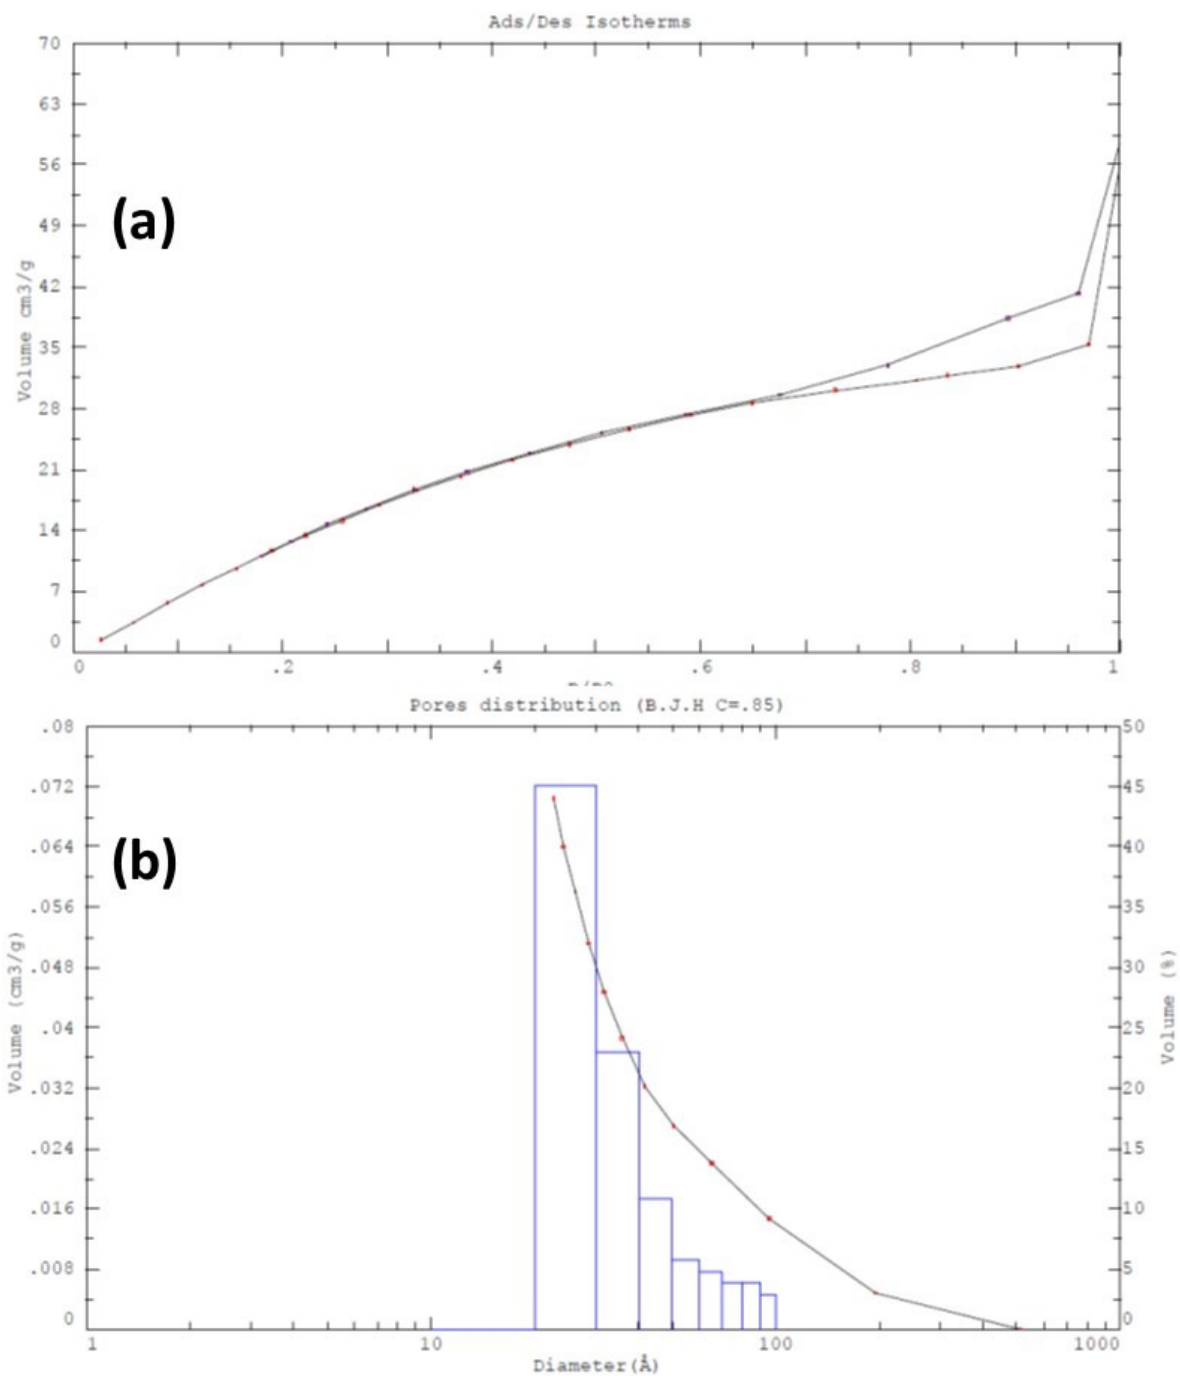

**Figure S8.** (a) Typical  $\text{N}_2$  adsorption/desorption isotherm and (b) BJH plot for the as synthesized  $\text{In}_2\text{Se}_3$  nanomaterials.

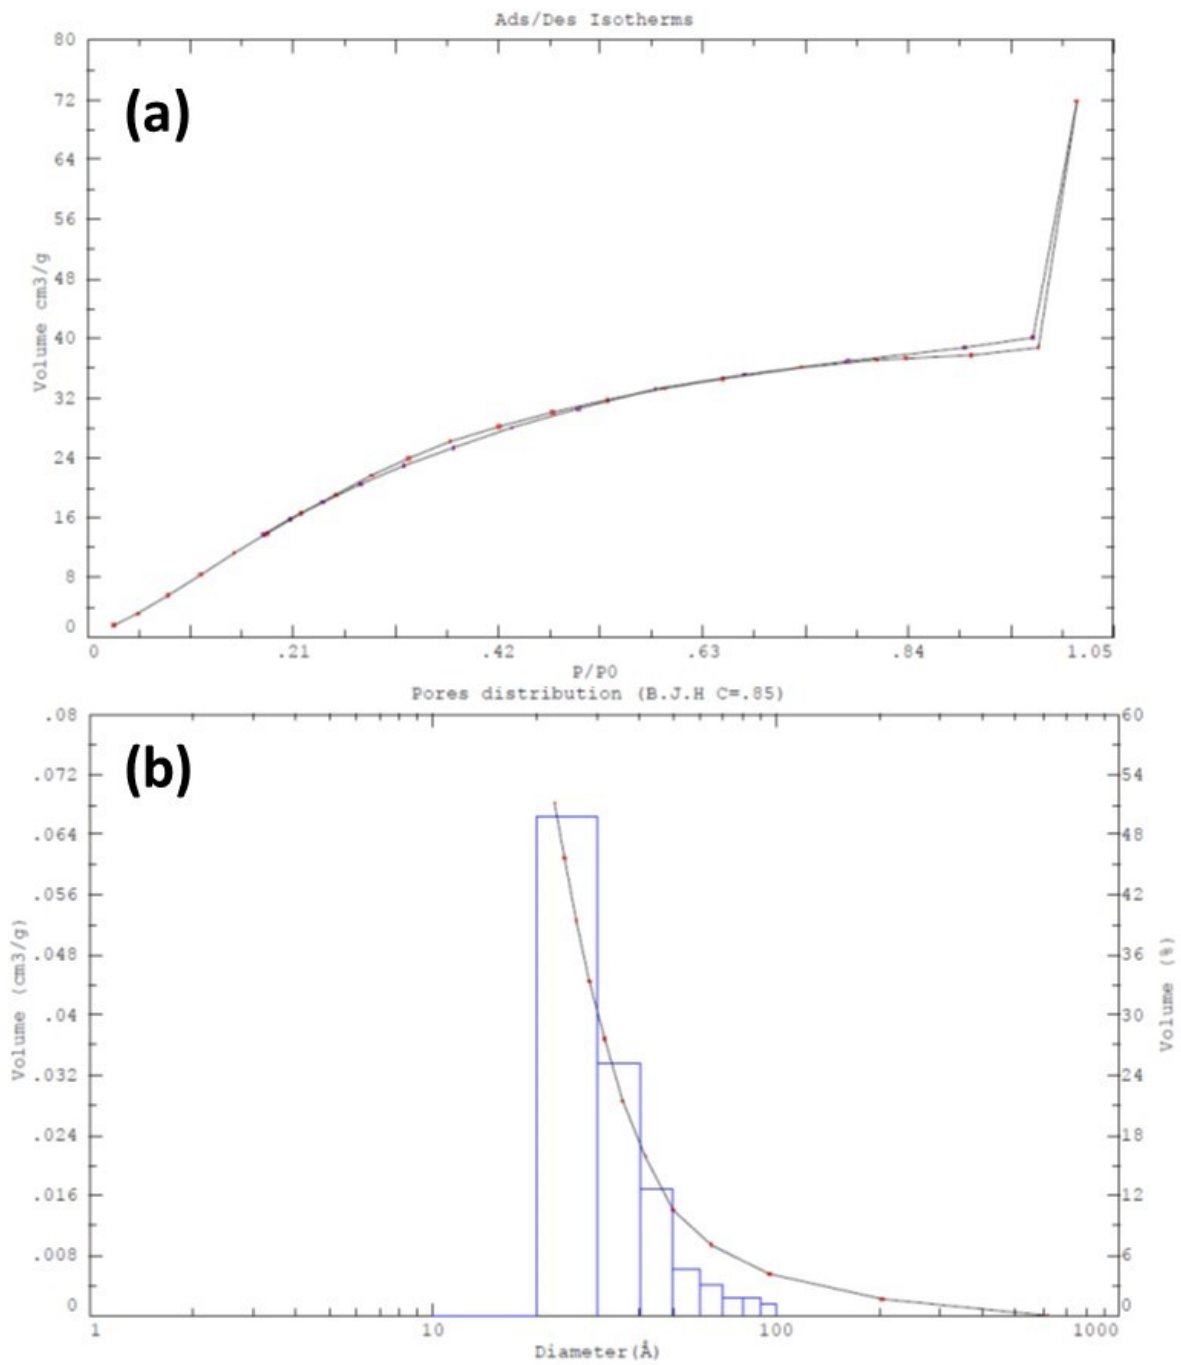

**Figure S9.** (a) Typical  $N_2$  adsorption/desorption isotherm and (b) BJH plot for the synthesized InSe nanomaterials.

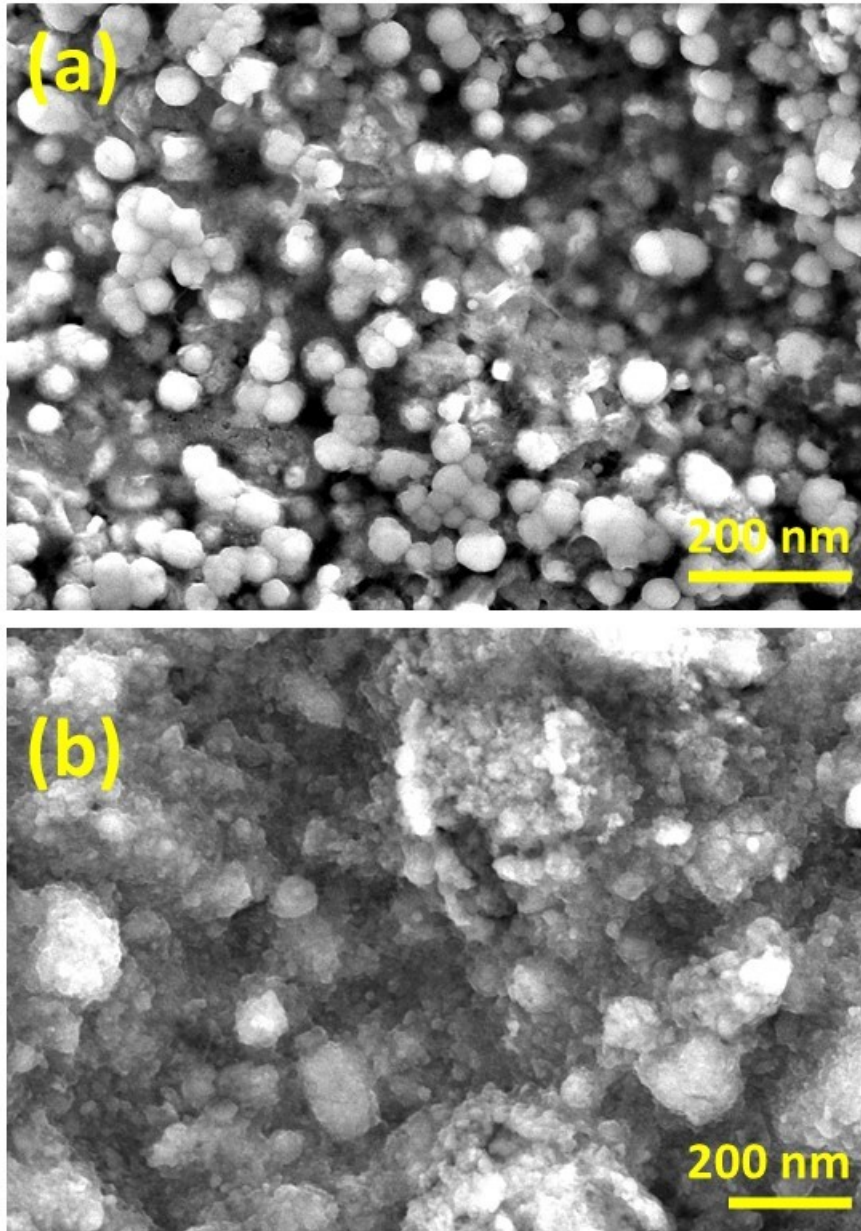

**Figure S10.** SEM micrographs of the electrodes consists of (a) hexagonal  $\text{In}_2\text{Se}_3$  and (b) cubic  $\text{InSe}$  after 200 cycle run.

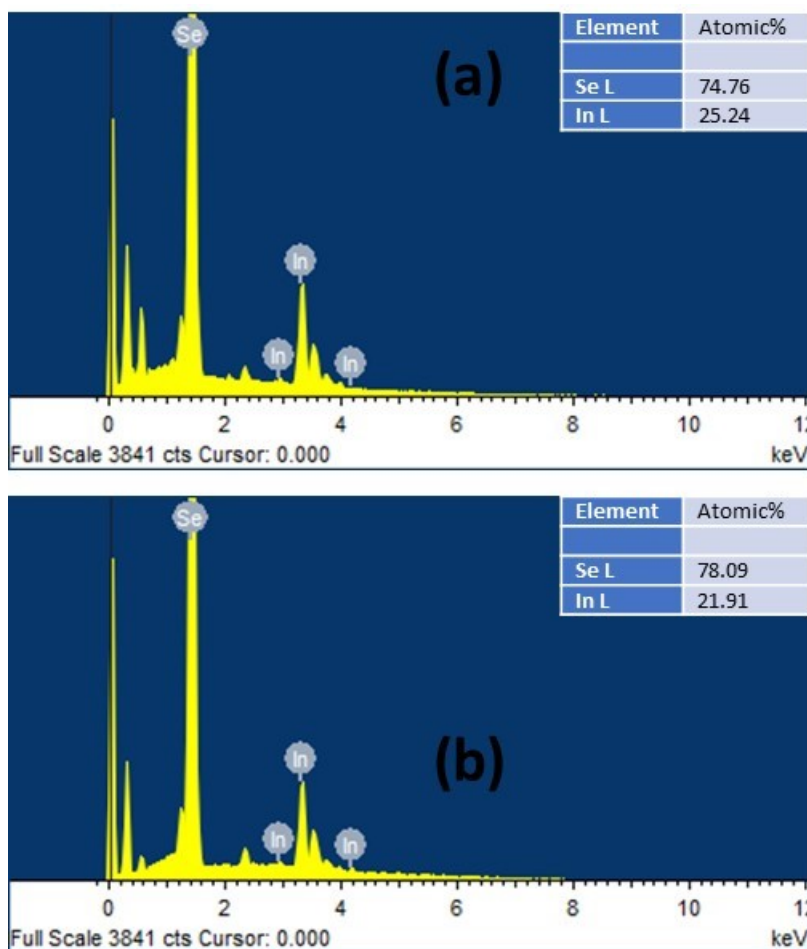

**Figure S11.** EDS spectra of the electrodes consists of (a) hexagonal  $\text{In}_2\text{Se}_3$  and (b) cubic  $\text{InSe}$  after 200 cycle run.

## References:

1. K. K. Bhasin and J. Singh, *J. Organomet. Chem.*, 2002, **658**, 71–76.
2. B. P. Invernizzi, D. Dupont and C. Caze, *Opt. Eng.*, 2001, **40**, 1082–1092.
3. Rigaku Oxford Diffraction, CrysAlis Pro Software System, Version 1.171, Rigaku Corporation, Oxford, UK, 2015.
4. L. Palatinus and G. Chapuis, *J. Appl. Crystallogr.*, 2007, **40**, 786–790.
5. G. M. Sheldrick, *Acta Crystallogr., Sect. C: Struct. Chem.*, 2015, **71**, 3–8.
6. C. K. Johnson, ORTEP II, Report ORNL-5136, Oak Ridge National Laboratory, Oak Ridge TN, 1976.

7. T. S. B. Baul, W. Rynjah, E. Rivarola, A. Lyčka, M. Holčapek, R. Jirásko, D. de Vos, R. J. Butcher and A. Linden, *J. Organomet. Chem.*, 2006, **691**, 4850–4862.
